# Supplementary material for: Theoretical study on Y-doped Na2ZrO3 as a high-capacity Na-rich cathode material based on anionic redox
Source: Royal Society of Chemistry journal article supplement (doi:10.1039/d2cp02219b), 2022-01-01
Supplement: d2cp02219b1.pdf [file d2cp02219b1.pdf]

## Supporting Information for

### **Theoretical Study of Y-doped Na<sub>2</sub>ZrO<sub>3</sub> as a High-capacity Na-rich Cathode Material Based on Anionic Redox**

Huimin Yin,<sup>a</sup> Jiajia Huang,<sup>a</sup> Ningjing Luo,<sup>a</sup> Yongfan Zhang<sup>a</sup> and Shuping Huang<sup>\*a,b</sup>

<sup>a</sup>College of Chemistry, Fuzhou University, Fuzhou, Fujian 350108, P. R. China

<sup>b</sup>Fujian Provincial Key Laboratory of Electrochemical Energy Storage Materials, Fuzhou University, Fuzhou, Fujian 350108, P. R. China

\*E-mail: huangshp@gmail.com

## CONTENTS

**Table S1.** (Page S4) Variation of lattice parameters (in %) obtained by optimizing  $\text{Na}_2\text{ZrO}_3$  under PBE, PBE-D3 and PBE-D2 methods compared with experimental values.

**Determination of  $U$  in PBE+ $U$**  (Page S5)

**Table S2.** (Page S7) The magnetic moments ( $\mu_B$ ) of eight oxygens in  $\text{Na}_{15}\text{Zr}_8\text{O}_{24}$  by PBE+ $U$  and HSE06.

**Table S3.** (Page S8) Distances ( $\text{\AA}$ ) between different types of oxygen and surrounding Na and Zr atoms of NZO by PBE.

**Table S4.** (Page S9) Comparison of lattice parameters of  $\text{Na}_{32}\text{Zr}_{16}\text{O}_{48}$  and  $\text{Na}_{32}\text{Zr}_{14}\text{Y}_2\text{O}_{47}$  from the PBE-D3 functional and experimental data.

**Table S5.** (Page S10) Lattice constants and volumes of the lowest-energy  $\text{Na}_{16-x}\text{Zr}_8\text{O}_{24}$  with  $x = 1 \sim 12$ .

**Table S6.** (Page S11) The magnetic moments of oxygens<sup>a</sup> whose absolute values are greater than  $0.01 \mu_B$  of  $\text{Na}_{16-x}\text{Zr}_8\text{O}_{24}$  calculated by PBE+ $U$ -D3 and HSE06-D3 functionals.

**Table S7.** (Page S12) The magnetic moments of oxygens<sup>a</sup> whose absolute values are greater than  $0.06 \mu_B$  of  $\text{Na}_{16-x}\text{Zr}_8\text{O}_{24}$  calculated by PBE-D3 functional.

**Table S8.** (Page S13) Migration energy barriers of Na ion by PBE+ $U$ -D3 in different pathways from the mixed layer to the pure Na layer of NZO and Y-NZO along  $c$  direction.

**Figure S1.** (Page S14) (a) The coordination environment of oxygen and (b) the  $\text{ZrO}_6$  octahedron from the initial  $\text{Na}_2\text{ZrO}_3$  compound using PBE functional. (c) The  $\text{ZrO}_6$  octahedron after half Na desodiation.

**Figure S2.** (Page S15) The structure of Y-doped NZO with the lowest energy.

**Figure S3.** (Page S16) Band structure of NZO calculated using HSE06-D3, showing an indirect band gap of 6.16 eV.

**Figure S4.** (Page S17) The variation of lattice constants  $a$ ,  $b$ ,  $c$ ,  $\alpha$ ,  $\beta$ ,  $\gamma$  and volumes with  $x$  in  $\text{Na}_{16-x}\text{Zr}_8\text{O}_{24}$ .

**Figure S5.** (Page S18) (a) Na atoms at different positions in the mixed  $\text{Na}_{1/3}\text{Zr}_{2/3}$  layer and pure Na layer. (b) The relative energy of Na in different positions.

**Figure S6.** (Page S19) The frame structure of  $\text{ZrO}_6$  honeycomb layer and pure sodium layer alternately arranged from different views after all of Na atoms in the mixed layer are

removed.

**Figure S7.** (Page S20) Honeycomb structures of Zr in  $\text{Na}_{16-x}\text{Zr}_8\text{O}_{24}$  ( $x = 0, 4, 10$ ).

**Figure S8.** (Page S21) (a) The newly formed O1\*-type structure after removing 8Na from  $\text{Na}_{16}\text{Zr}_8\text{O}_{24}$ . The top view of O3 (b) and O1\* (c) type.

**Figure S9.** (Page S22) The structures of  $\text{Na}_{16-x}\text{Zr}_8\text{O}_{24}$  ( $x = 10, 11, 12$  and  $16$ ) and layer structures will be completely distorted and shift to  $\text{ZrO}_3$  phase when  $x > 10$ .

**Figure S10.** (Page S23) The magnetization of O ions during desodiation of NZO by PBE+U-D3.

**Fig. S11.** (Page S24) The magnetization of O ions during desodiation of optimal  $\text{Na}_{32-n}\text{Zr}_{14}\text{Y}_2\text{O}_{47}$  ( $0 \leq n \leq 32$ ) by PBE+U-D3. The various symbols represent the 47 unique O ions in Y-NZO.

**Fig. S12.** (Page S25) (a) The calculated desodiation potentials of  $\text{Na}_{32-n}\text{Zr}_{14}\text{Y}_2\text{O}_{47}$  ( $0 \leq n \leq 32$ ) by PBE+U-D3. (b) The optimal structures of  $\text{Na}_{32-n}\text{Zr}_{14}\text{Y}_2\text{O}_{47}$  for  $n = 0, 16, 24,$  and  $32,$  respectively.

**Table S1** Variation of lattice parameters (in %) obtained by optimizing Na<sub>2</sub>ZrO<sub>3</sub> under PBE, PBE-D3 and PBE-D2 methods compared with experimental values.

|        | $\Delta a/a$ | $\Delta b/b$ | $\Delta c/c$ | $\Delta \beta/\beta$ |
|--------|--------------|--------------|--------------|----------------------|
| PBE    | 0.73         | 0.79         | 0.94         | 0.03                 |
| PBE-D3 | 0.16         | 0.10         | 0.55         | 0.02                 |
| PBE-D2 | 0.25         | 0.24         | 1.90         | 0.07                 |

### Determination of $U$ in PBE+ $U$ .

The GGA is unable to describe the local oxygen polarons due to self-interaction errors. As early as 2005, Nalon et al.<sup>1</sup> successfully applied the DFT+ $U$  method to the study of defective oxide Li-doped MgO and also illustrated that this method can also be applied to localized O 2p hole states.<sup>2</sup> And the addition of  $U$  to the O 2p orbitals has been widely used in theoretical investigations of many materials.<sup>3-11</sup>

In this work, we also have a discussion on the selection of the appropriate  $U$  value. With Na removed from Na<sub>2</sub>ZrO<sub>3</sub>, oxygen oxidation reactions occur in the system, accompanied with changes of its magnetic moments. The magnetic moment is one of the references to determine whether the oxygen hole polarons is localized or non-localized. Through calculations, we find that the magnetic moments of eight oxygens in the conventional cell of Na<sub>16-x</sub>Zr<sub>8</sub>O<sub>24</sub> change significantly during the desodiation (The magnetic moment of oxygens are mainly concentrated on O1, O2, O3, O4, O13, O14, O15 and O16, and the absolute value of the magnetic moment of the other oxygens are less than 0.01  $\mu_B$ , which is negligible). Therefore, we tested the effects of different  $U$  values applied to the 2p orbitals of O in Na<sub>15</sub>Zr<sub>8</sub>O<sub>24</sub> on the magnetic moments of O. The PBE+ $U$  results were compared with the ones by HSE06 functional in Table S1.

Here, we introduce a parameter  $r$  ( $r$  represents the change-ratio), defined as:

$$r = \frac{\mu_{B-tot} - \mu_{B-sum}}{\mu_{B-tot}}$$

where  $\mu_{B-total}$  represents the sum of magnetic moments of all oxygens and  $\mu_{B-sum}$  represents the sum of magnetic moments of the corresponding 8 oxygens. As shown in Table S1, when  $U = 0$ , the hole is delocalized and the difference between  $\mu_{B-total}$  and  $\mu_{B-sum}$  is large (the change-ratio is 41.92%). With the value of  $U$  increasing,  $r$  decreases continuously. When  $U = 6$  eV, the change-ratio ( $r$ ) is close to those obtained by HSE06 functional. Hence,  $U = 6$  eV was chosen for O of Na<sub>16-x</sub>Zr<sub>8</sub>O<sub>24</sub> ( $0 < x < 16$ ) in the PBE+ $U$  calculation.

### References:

- 1 M. Nolan, G. W. Watson, *Surf. Sci.*, 2005, **586**, 25-37.
- 2 M. Nolan, G. W. Watson, *The Journal of Chemical Physics*, 2006, **125**, 144701.

- 3 B. J. Morgan, G. W. Watson, *Phys. Rev. B*, 2009, **80**, 233102.
- 4 S. P. Ong, Y. Mo, G. Ceder, *Phys. Rev. B*, 2012, **85**, 081105.
- 5 A. Janotti, J. B. Varley, M. Choi, C. G. Van de Walle, *Phys. Rev. B*, 2014, **90**, 085202.
- 6 P. Erhart, A. Klein, D. Åberg, B. Sadigh, *Phys. Rev. B*, 2014, **90**, 035204.
- 7 S. Huang, B. E. Wilson, B. Wang, Y. Fang, K. Buffington, A. Stein, D. G. Truhlar, *J. Am. Chem. Soc.*, 2015, **137**, 10992-11003.
- 8 S. Huang, B. E. Wilson, W. H. Smyrl, D. G. Truhlar, A. Stein, *Chem. Mater.*, 2016, **28**, 746-755.
- 9 A. Lindman, P. Erhart, G. Wahnström, *Phys. Rev. B*, 2016, **94**, 075204.
- 10 G. Geneste, B. Amadon, M. Torrent, G. Dezanneau, *Phys. Rev. B*, 2017, **96**, 134123.
- 11 J. Huang, X. Cai, H. Yin, Y. Li, W. Lin, S. Huang, Y. Zhang, *J. Phys. Chem. Lett.*, 2021, **12**, 2721-2726.

**Table S2** The magnetic moments ( $\mu_B$ ) of eight oxygens in  $\text{Na}_{15}\text{Zr}_8\text{O}_{24}$  by PBE+ $U$ -D3 and HSE06-D3.

| Method       | $U$ (eV) | Magnetic moments ( $\mu_B$ ) of eight oxygens in $\text{Na}_{15}\text{Zr}_8\text{O}_{24}$ |       |       |       |       |       |       |       |                      |                        |         |
|--------------|----------|-------------------------------------------------------------------------------------------|-------|-------|-------|-------|-------|-------|-------|----------------------|------------------------|---------|
|              |          | O1                                                                                        | O2    | O3    | O4    | O13   | O14   | O15   | O16   | $\mu_{B\text{-sum}}$ | $\mu_{B\text{-total}}$ | $r$ (%) |
| PBE+ $U$ -D3 | 0        | 0.031                                                                                     | 0.031 | 0.011 | 0.011 | 0.200 | 0.200 | 0.006 | 0.006 | 0.496                | 0.854                  | 41.92   |
|              | 1        | 0.013                                                                                     | 0.013 | 0.005 | 0.005 | 0.313 | 0.313 | 0.002 | 0.002 | 0.666                | 0.876                  | 23.97   |
|              | 2        | 0.006                                                                                     | 0.006 | 0.003 | 0.003 | 0.368 | 0.368 | 0.001 | 0.001 | 0.756                | 0.886                  | 14.67   |
|              | 3        | 0.003                                                                                     | 0.003 | 0.003 | 0.003 | 0.395 | 0.395 | 0.001 | 0.001 | 0.804                | 0.902                  | 10.86   |
|              | 4        | 0.002                                                                                     | 0.002 | 0.002 | 0.002 | 0.414 | 0.414 | 0.001 | 0.001 | 0.838                | 0.916                  | 8.52    |
|              | 5        | 0.002                                                                                     | 0.002 | 0.002 | 0.002 | 0.431 | 0.431 | 0.000 | 0.000 | 0.870                | 0.936                  | 7.05    |
|              | 6        | 0.001                                                                                     | 0.001 | 0.002 | 0.002 | 0.446 | 0.446 | 0.000 | 0.000 | 0.898                | 0.950                  | 5.47    |
|              | 7        | 0.001                                                                                     | 0.001 | 0.002 | 0.002 | 0.460 | 0.460 | 0.000 | 0.000 | 0.926                | 0.968                  | 4.34    |
|              | 8        | 0.001                                                                                     | 0.001 | 0.001 | 0.001 | 0.474 | 0.474 | 0.000 | 0.000 | 0.952                | 0.988                  | 3.64    |
| HSE06-D3     | -        | 0.002                                                                                     | 0.002 | 0.002 | 0.002 | 0.420 | 0.420 | 0.000 | 0.000 | 0.848                | 0.902                  | 5.99    |

**Table S3** Distances ( $\text{\AA}$ ) between different types of oxygen and surrounding Na and Zr atoms of NZO by PBE+*U*-D3.<sup>a</sup>

|                | Zr1   | Zr2   | Na1   | Na2   | Na3   | Na4   |
|----------------|-------|-------|-------|-------|-------|-------|
| O <sub>A</sub> | 2.114 | 2.103 | 2.366 | 2.334 | 2.517 | 2.539 |
| O <sub>B</sub> | 2.107 | 2.107 | 2.372 | 2.335 | 2.551 | 2.515 |
| O <sub>C</sub> | 2.131 | 2.121 | 2.374 | 2.285 | 2.442 | 2.432 |

<sup>a</sup>Zr1 represents the Zr atom farther from the O atom, and Zr2 represents the Zr atom closer to the O atom. Na1 represents the Na atom in the mixed layer, Na2 is opposite to Na1, and Na3 and Na4 are opposite to Zr1 and Zr2, respectively (details are in **Figure S1**).



**Table S4** Comparison of lattice parameters of  $\text{Na}_{32}\text{Zr}_{16}\text{O}_{48}$  and  $\text{Na}_{32}\text{Zr}_{14}\text{Y}_2\text{O}_{47}$  from the PBE+*U*-D3 functional and experimental data.<sup>a</sup>

|                                                       | a (Å) | b (Å) | c (Å)  | $\beta$ (°) |
|-------------------------------------------------------|-------|-------|--------|-------------|
| $\text{Na}_{32}\text{Zr}_{16}\text{O}_{48}$           | 5.61  | 9.74  | 11.07  | 100.00      |
| $\text{Na}_{32}\text{Zr}_{14}\text{Y}_2\text{O}_{47}$ | 5.64  | 9.79  | 11.03  | 100.09      |
| Experimental<br>(for Y- $\text{Na}_2\text{ZrO}_3$ )   | 5.633 | 9.815 | 11.120 | 99.764      |

<sup>a</sup> Even though the calculations are based on the  $2 \times 1 \times 1$  supercells, the lattice parameters here refer to the conventional cell for better comparison with the experimental values.

**Table S5** Lattice constants and volumes of the lowest-energy  $\text{Na}_{16-x}\text{Zr}_8\text{O}_{24}$  ( $x = 1 \sim 12$ ) by PBE+ $U$ -D3.

| $x$ | $a$ (Å) | $b$ (Å) | $c$ (Å) | $\alpha$ (°) | $\beta$ (°) | $\gamma$ (°) | $V$ (Å <sup>3</sup> ) | Volume change <sup>a</sup> (%) |
|-----|---------|---------|---------|--------------|-------------|--------------|-----------------------|--------------------------------|
| 0   | 5.59    | 9.70    | 11.02   | 90.00        | 100.00      | 90.00        | 588.23                | -                              |
| 1   | 5.61    | 9.76    | 11.01   | 90.00        | 100.39      | 90.00        | 592.39                | 0.71                           |
| 2   | 5.62    | 9.85    | 10.97   | 90.00        | 100.35      | 90.00        | 597.35                | 1.55                           |
| 3   | 5.66    | 9.93    | 10.98   | 90.00        | 100.95      | 90.00        | 606.13                | 3.04                           |
| 4   | 5.70    | 10.07   | 10.87   | 90.00        | 100.65      | 90.00        | 613.24                | 4.25                           |
| 5   | 5.71    | 10.22   | 10.72   | 89.47        | 99.40       | 88.89        | 616.77                | 4.85                           |
| 6   | 5.69    | 10.39   | 10.37   | 89.27        | 96.09       | 87.46        | 609.16                | 3.56                           |
| 7   | 5.70    | 10.52   | 10.28   | 88.22        | 95.56       | 89.64        | 613.01                | 4.21                           |
| 8   | 5.69    | 10.71   | 10.12   | 87.90        | 94.42       | 91.17        | 613.98                | 4.38                           |
| 9   | 5.72    | 10.79   | 10.11   | 85.32        | 94.99       | 91.80        | 619.34                | 5.29                           |
| 10  | 5.73    | 10.87   | 9.97    | 88.73        | 94.11       | 90.78        | 619.54                | 5.32                           |
| 11  | 5.90    | 11.30   | 8.34    | 62.73        | 93.03       | 96.16        | 491.32                | -16.48                         |
| 12  | 5.94    | 11.97   | 9.34    | 52.95        | 96.83       | 103.23       | 515.50                | -12.37                         |

<sup>a</sup> Relative to the initial  $\text{Na}_{16}\text{Zr}_8\text{O}_{24}$  conventional unit cell, i.e.,  $x = 0$ .

**Table S6** The magnetic moments of oxygens<sup>a</sup> of Na<sub>16-x</sub>Zr<sub>8</sub>O<sub>24</sub> calculated by PBE+*U*-D3 and HSE06-D3 functionals, whose absolute values are greater than 0.01  $\mu_B$ .

|                   | x  | O1    | O2    | O3    | O4    | O13   | O14   | O15   | O16   | $\mu_{B\text{-sum}}^b$ | $\mu_{B\text{-total}}^b$ |
|-------------------|----|-------|-------|-------|-------|-------|-------|-------|-------|------------------------|--------------------------|
| PBE+ <i>U</i> -D3 | 0  | 0.00  | 0.00  | 0.00  | 0.00  | 0.00  | 0.00  | 0.00  | 0.00  | 0.00                   | 0.00                     |
|                   | 1  | 0.00  | 0.00  | 0.00  | 0.00  | 0.45  | 0.45  | 0.00  | 0.00  | 0.90                   | 0.95                     |
|                   | 2  | 0.00  | 0.00  | 0.00  | 0.00  | 0.45  | 0.45  | 0.45  | 0.45  | 1.80                   | 1.90                     |
|                   | 3  | 0.46  | 0.46  | 0.00  | 0.00  | 0.45  | 0.45  | 0.46  | 0.46  | 2.74                   | 2.86                     |
|                   | 4  | 0.46  | 0.46  | 0.46  | 0.46  | 0.46  | 0.46  | 0.46  | 0.46  | 3.68                   | 3.82                     |
|                   | 5  | 0.42  | 0.51  | 0.53  | 0.40  | 0.31  | 0.61  | 0.00  | 0.00  | 2.78                   | 2.85                     |
|                   | 6  | 0.00  | 0.00  | 0.34  | 0.58  | 0.34  | 0.58  | 0.00  | 0.00  | 1.84                   | 1.91                     |
|                   | 7  | 0.00  | 0.00  | 0.33  | 0.60  | 0.00  | 0.00  | 0.00  | 0.00  | 0.93                   | 0.95                     |
|                   | 8  | 0.00  | 0.00  | 0.00  | 0.00  | 0.00  | 0.00  | 0.00  | 0.00  | 0.00                   | 0.00                     |
|                   | 9  | -0.43 | -0.45 | 0.00  | 0.00  | 0.00  | 0.00  | 0.00  | 0.00  | -0.88                  | -0.91                    |
|                   | 10 | 0.00  | 0.00  | 0.00  | 0.00  | -0.43 | -0.46 | -0.46 | -0.41 | -1.76                  | -1.81                    |
|                   | 11 | 0.00  | 0.00  | -0.51 | -0.36 | 0.45  | 0.44  | 0.41  | 0.47  | 0.90                   | 0.91                     |
| HSE06-D3          | 12 | 0.43  | 0.43  | 0.43  | 0.43  | 0.43  | 0.43  | 0.43  | 0.43  | 3.44                   | 3.53                     |
|                   | 1  | 0.00  | 0.00  | 0.00  | 0.00  | 0.42  | 0.42  | 0.00  | 0.00  | 0.84                   | 0.88                     |

<sup>a</sup>The magnetic moment of oxygens are mainly concentrated on O1, O2, O3, O4, O13, O14, O15 and O16, and the absolute value of the magnetic moment of the other oxygens are less than 0.01  $\mu_B$ , which is negligible.

<sup>b</sup> $\mu_{B\text{-sum}}$  represents the sum of magnetic moments of the corresponding 8 oxygens (O1, O2, O3, O4, O13, O14, O15 and O16), and  $\mu_{B\text{-total}}$  is the sum of magnetic moments of all oxygens.

**Table S7** The magnetic moments of oxygens<sup>a</sup> of Na<sub>16-x</sub>Zr<sub>8</sub>O<sub>24</sub> calculated by PBE-D3 functional, whose absolute values are greater than 0.06  $\mu_B$ .

|     | x  | O1    | O2    | O3    | O4    | O13   | O14   | O15   | O16   | $\mu_{B\text{-sum}}$ <sup>b</sup> | $\mu_{B\text{-total}}$ <sup>b</sup> |
|-----|----|-------|-------|-------|-------|-------|-------|-------|-------|-----------------------------------|-------------------------------------|
|     | 0  | 0.00  | 0.00  | 0.00  | 0.00  | 0.00  | 0.00  | 0.00  | 0.00  | 0.00                              | 0.00                                |
|     | 1  | 0.03  | 0.03  | 0.01  | 0.01  | 0.20  | 0.20  | 0.01  | 0.01  | 0.50                              | 0.85                                |
|     | 2  | 0.03  | 0.03  | 0.03  | 0.03  | 0.27  | 0.27  | 0.28  | 0.28  | 1.22                              | 0.72                                |
|     | 3  | 0.35  | 0.35  | 0.01  | 0.01  | 0.33  | 0.33  | 0.36  | 0.36  | 2.10                              | 2.55                                |
|     | 4  | -0.38 | -0.38 | 0.38  | 0.38  | 0.38  | 0.38  | -0.38 | -0.38 | 0.00                              | 0.00                                |
|     | 5  | 0.39  | 0.40  | 0.40  | 0.38  | 0.36  | 0.43  | 0.00  | 0.00  | 2.36                              | 2.56                                |
| PBE | 6  | 0.00  | 0.00  | -0.37 | -0.42 | 0.37  | 0.42  | 0.00  | 0.00  | 0.00                              | 0.00                                |
|     | 7  | 0.00  | 0.00  | -0.37 | -0.43 | 0.00  | 0.00  | 0.00  | 0.00  | -0.77                             | -0.85                               |
|     | 8  | 0.00  | 0.00  | 0.00  | 0.00  | 0.00  | 0.00  | 0.00  | 0.00  | 0.00                              | 0.00                                |
|     | 9  | -0.20 | -0.21 | -0.06 | -0.07 | -0.01 | -0.01 | -0.11 | -0.12 | -0.79                             | -0.84                               |
|     | 10 | 0.19  | 0.19  | 0.18  | 0.20  | 0.19  | 0.19  | 0.20  | 0.19  | 1.53                              | 1.68                                |
|     | 11 | -0.19 | -0.17 | -0.30 | -0.26 | -0.36 | -0.36 | -0.33 | -0.35 | -2.32                             | -2.53                               |
|     | 12 | -0.38 | -0.38 | 0.39  | 0.38  | 0.39  | 0.39  | 0.39  | 0.39  | 1.57                              | 1.63                                |

<sup>a</sup>The magnetic moment of oxygens are mainly concentrated on O1, O2, O3, O4, O13, O14, O15 and O16, and the absolute value of the magnetic moment of the other oxygens are less than 0.06  $\mu_B$ , which is negligible.

<sup>b</sup> $\mu_{B\text{-sum}}$  represents the sum of magnetic moments of the corresponding 8 oxygens (O1, O2, O3, O4, O13, O14, O15 and O16), and  $\mu_{B\text{-total}}$  is the sum of magnetic moments of all oxygens.

**Table S8** Migration energy barriers<sup>b</sup> of Na ion by PBE+*U*-D3 in different pathways from the mixed layer to the pure Na layer of NZO and Y-NZO along *c* direction.

| Paths      | Migration barriers (eV) |             |
|------------|-------------------------|-------------|
|            | NZO                     | Y-NZO       |
| Na2 → Na4  | 0.56 (0.80)             | 0.50 (0.60) |
| Na2 → Na5  | 0.52 (0.80)             | 0.75 (0.61) |
| Na2 → Na6  | 0.53 (0.80)             | 0.62 (0.62) |
| Na2 → Na3  | 0.52 (0.75)             | 0.77 (0.77) |
| Na2 → Na15 | 0.48 (0.76)             | 0.58 (0.72) |
| Na2 → Na16 | 0.48 (0.76)             | 0.55 (0.63) |

<sup>b</sup> The reverse migration barriers are shown in brackets.

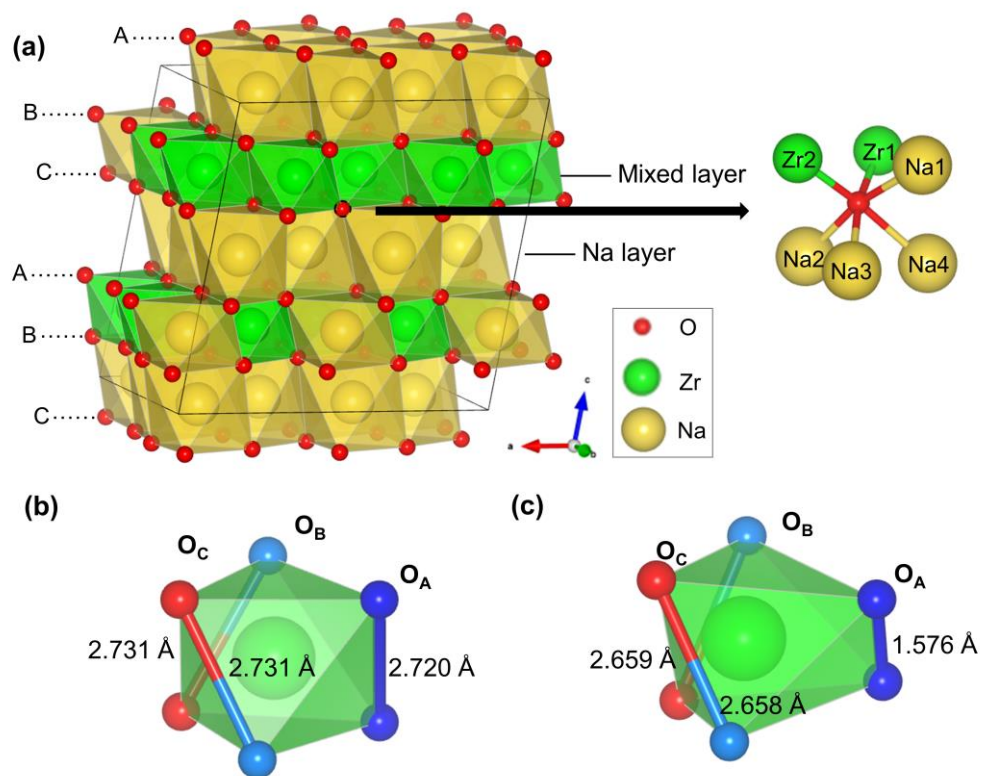

**Fig. S1** (a) The coordination environment of oxygen and (b) the  $\text{ZrO}_6$  octahedron from the initial  $\text{Na}_2\text{ZrO}_3$  compound using PBE+ $U$ -D3 functional. (c) The  $\text{ZrO}_6$  octahedron after half Na desodiation (PBE+ $U$ -D3). The blue, light blue and red balls in (b) and (c) represent  $\text{O}_A$ ,  $\text{O}_B$  and  $\text{O}_C$ , respectively.

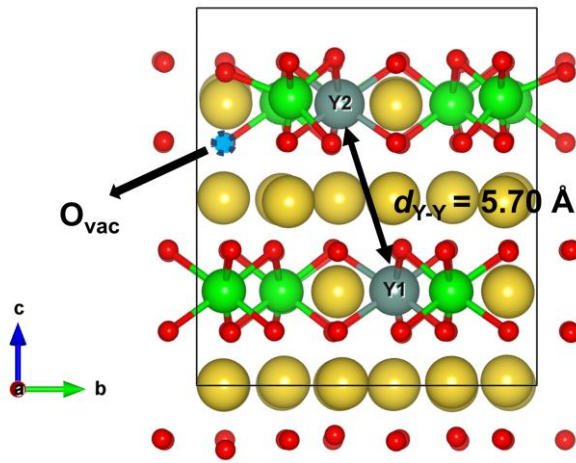

**Fig. S2** The structure of Y-doped NZO with the lowest energy by PBE+*U*-D3.

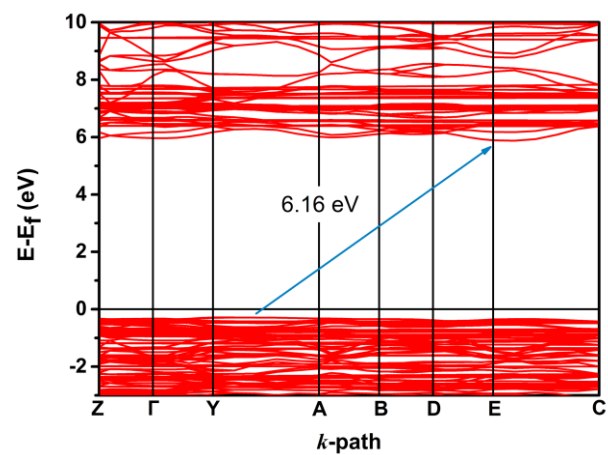

**Fig. S3** Band structure of NZO calculated using HSE06-D3, showing an indirect band gap of 6.16 eV.



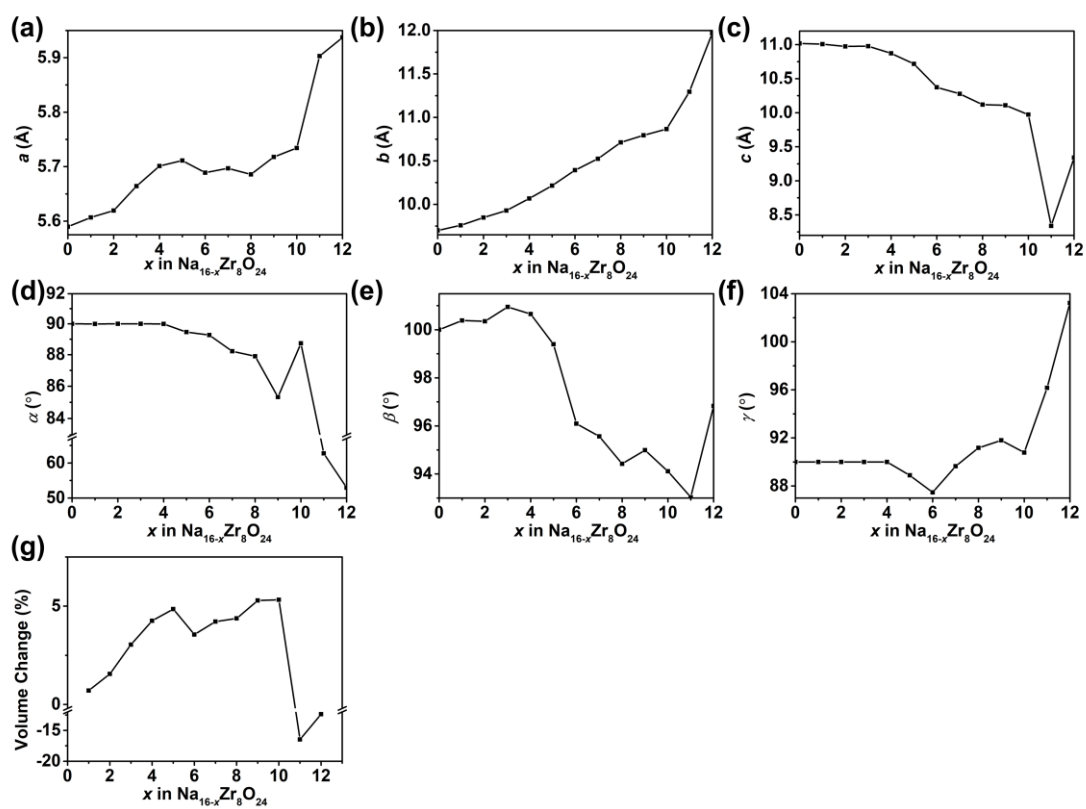

**Fig. S4** The variation of lattice constants  $a$ ,  $b$ ,  $c$ ,  $\alpha$ ,  $\beta$ ,  $\gamma$  and volumes with  $x$  in  $\text{Na}_{16-x}\text{Zr}_8\text{O}_{24}$  by PBE+ $U$ -D3.

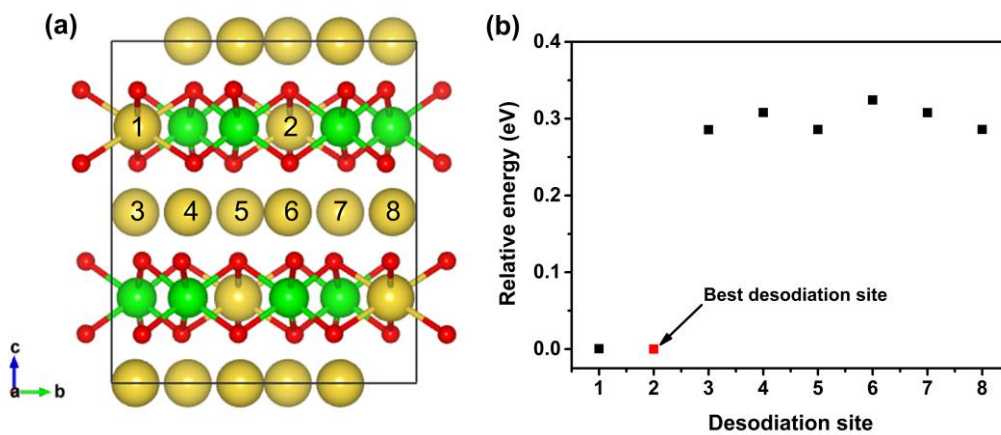

**Fig. S5** (a) The structure of NZO with different Na atoms at the mixed  $\text{Na}_{1/3}\text{Zr}_{2/3}$  layer and pure Na layer labelled. (b) The relative energies of  $\text{Na}_{15}\text{Zr}_8\text{O}_{24}$  with a Na vacancy at different positions. The best desodiation site is in the mixed layer.

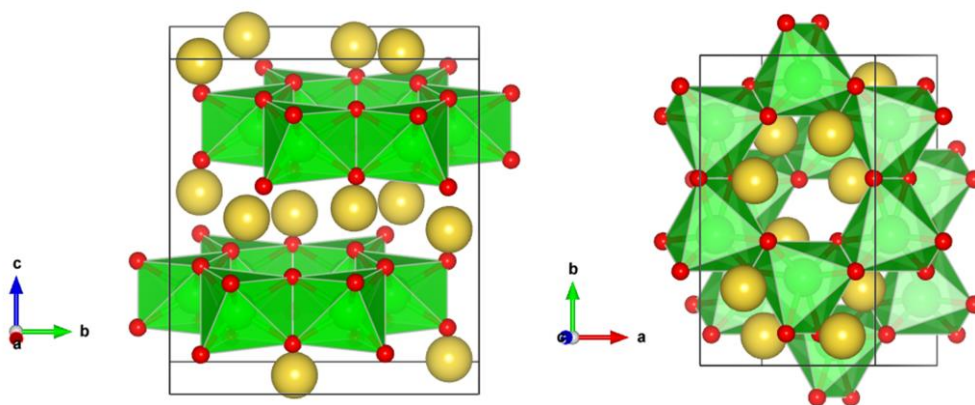

**Fig. S6** The frame structure of ZrO<sub>6</sub> honeycomb layer and pure sodium layer alternately arranged from different views after all of Na atoms in the mixed layer are removed. The red and yellow ball represent the O and Na, respectively. The green octahedron represents ZrO<sub>6</sub>.

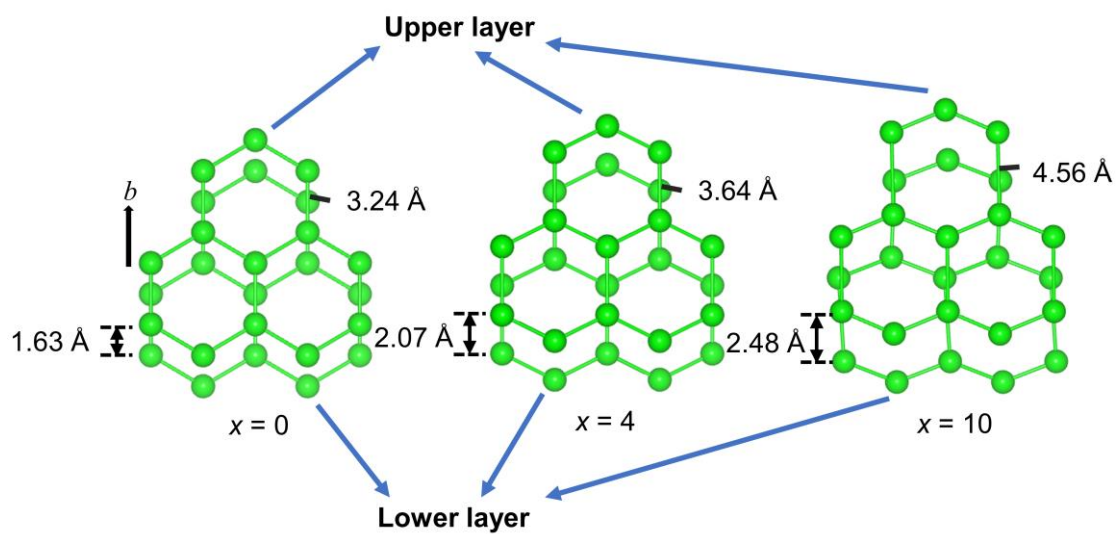

**Fig. S7** Honeycomb structures of Zr in  $\text{Na}_{16-x}\text{Zr}_8\text{O}_{24}$  ( $x = 0, 4, 10$ ). The lower distances 1.63, 2.07, 2.48 Å are the shifts between the upper and lower honeycomb structure of Zr along  $b$  direction. The upper distances 3.24, 3.64, and 4.56 Å are the Zr-Zr distances.

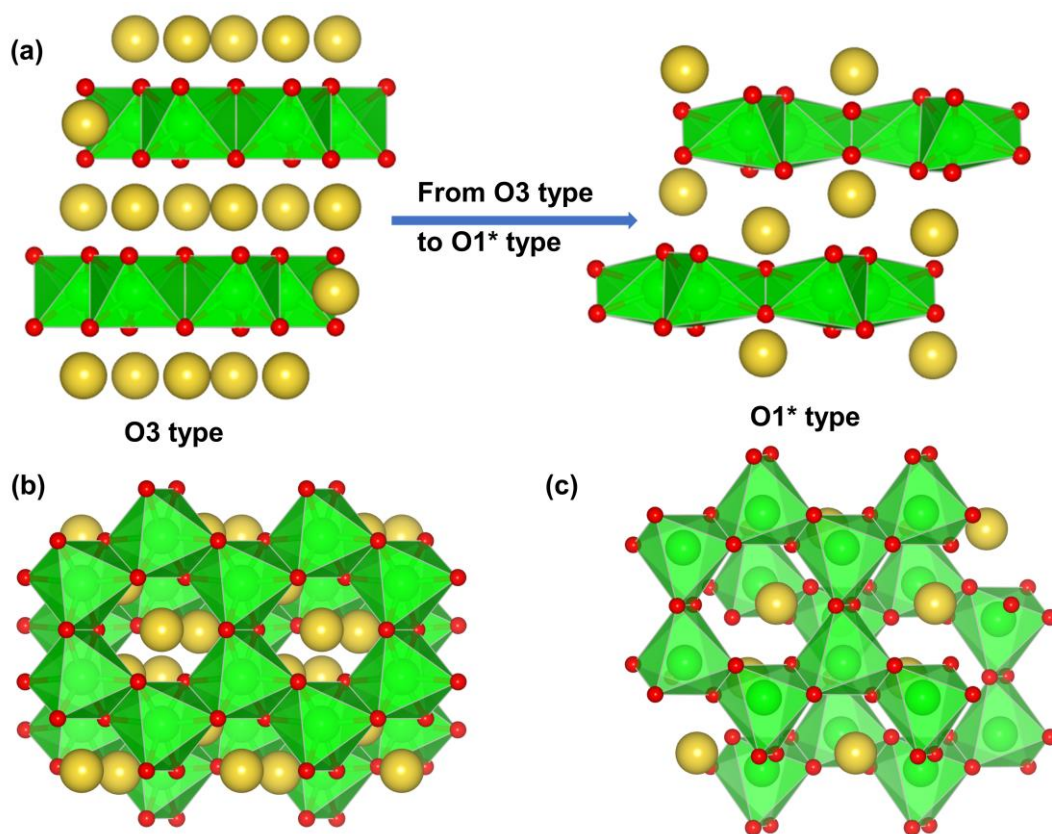

**Fig. S8** (a) The newly formed O1\*-type structure after removing 8Na from  $\text{Na}_{16}\text{Zr}_8\text{O}_{24}$ . The top view of O3 (b) and O1\* (c) type.

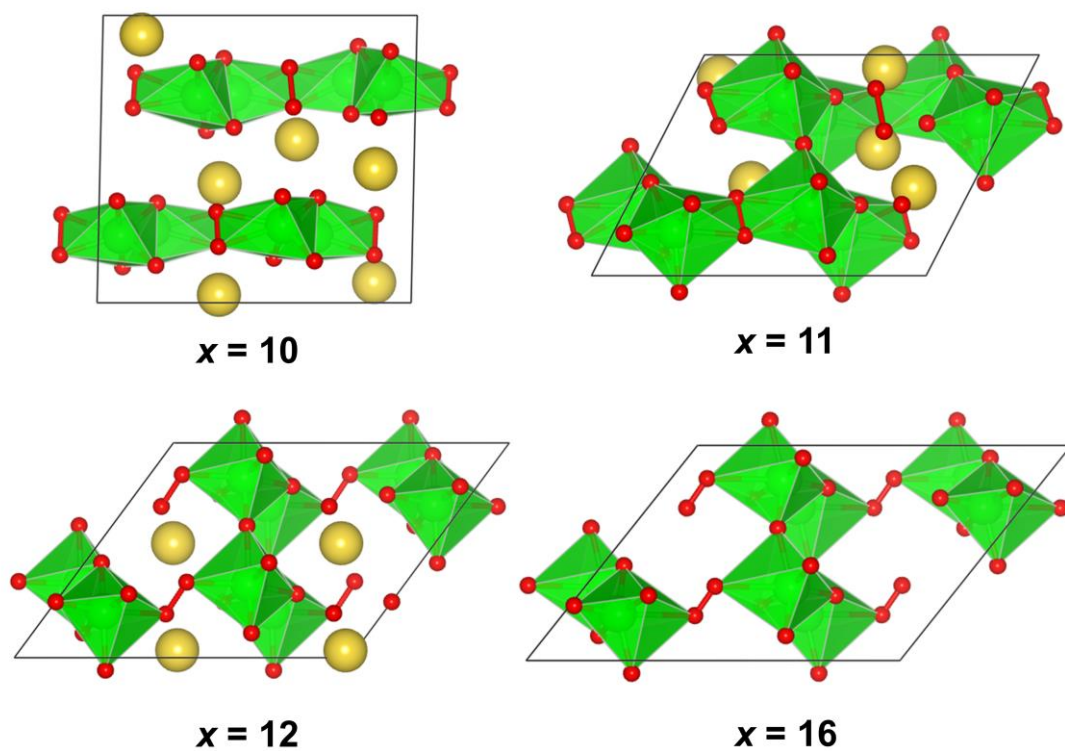

**Fig. S9** The structures of  $\text{Na}_{16-x}\text{Zr}_8\text{O}_{24}$  ( $x = 10, 11, 12$  and  $16$ ) and layer structures will be completely distorted and shift to  $\text{ZrO}_3$  phase when  $x > 10$ .

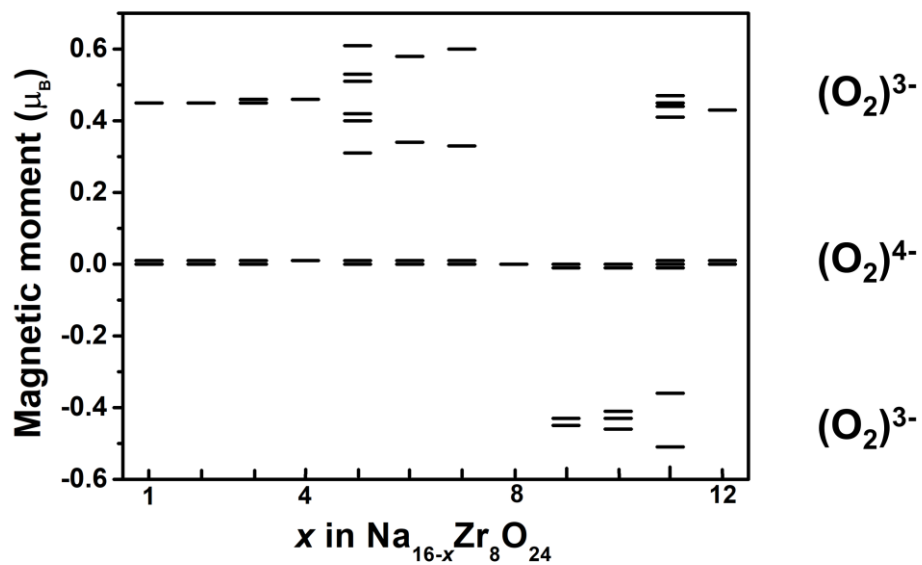

**Fig. S10** The magnetization of O ions during desodiation of NZO by PBE+ $U$ -D3.

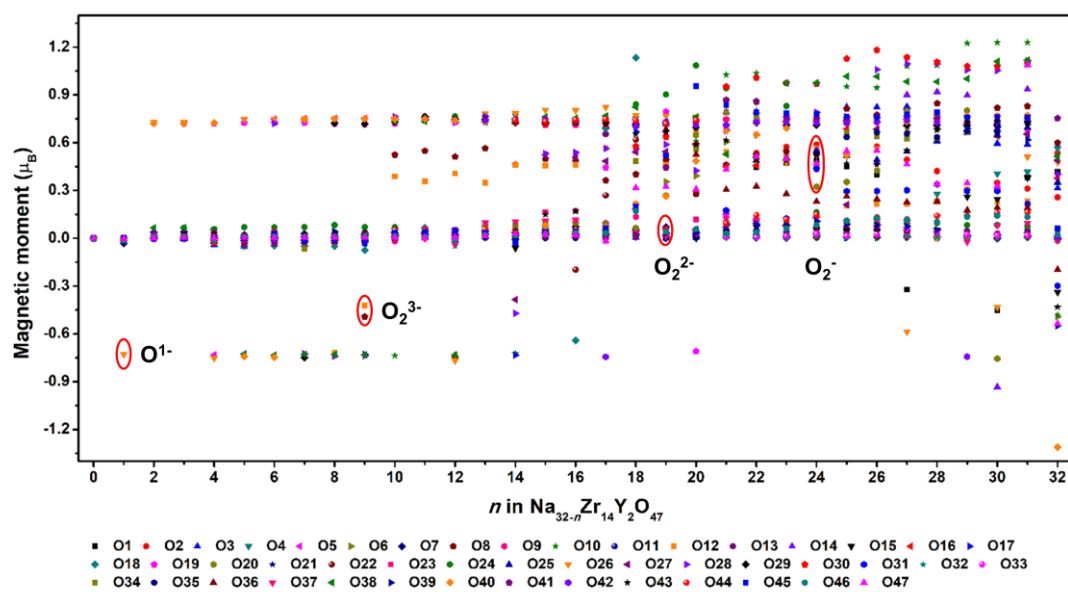

**Fig. S11** The magnetization of O ions during desodiation of optimal  $\text{Na}_{32-n}\text{Zr}_{14}\text{Y}_2\text{O}_{47}$  ( $0 \leq n \leq 32$ ) by PBE+ $U$ -D3. The various symbols represent the 47 unique O ions in Y-NZO.



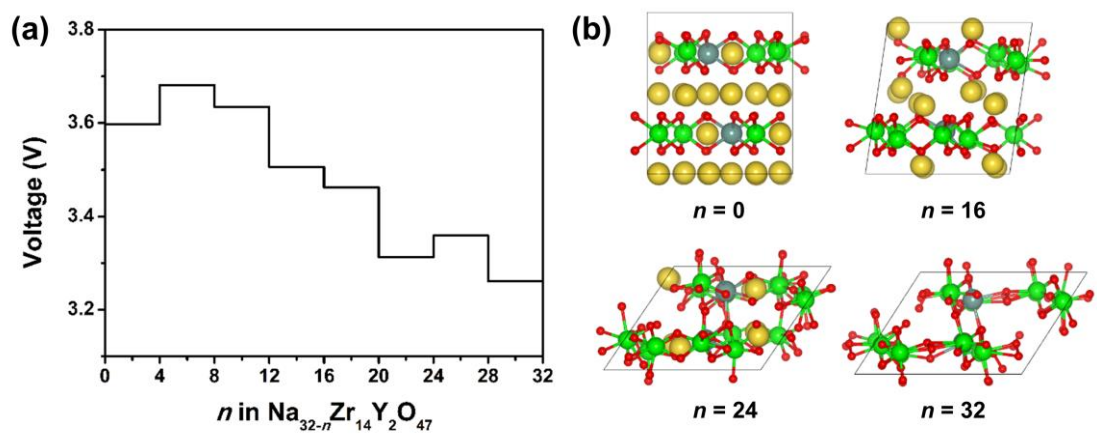

**Fig. S12** (a) The calculated desodiation potentials of  $\text{Na}_{32-n}\text{Zr}_{14}\text{Y}_2\text{O}_{47}$  ( $0 \leq n \leq 32$ ) by PBE+*U*-D3. (b) The optimal structures of  $\text{Na}_{32-n}\text{Zr}_{14}\text{Y}_2\text{O}_{47}$  for  $n = 0, 16, 24,$  and  $32,$  respectively.
